# Supplementary material for: Stress Responsiveness and Emotional Eating Depend on Youngsters’ Chronic Stress Level and Overweight
Source: MDPI journal article supplement (doi:10.3390/nu13103654), 2021-10-19
Supplement: s1 [file s1]

Figure S3: Moderating effects of stress measures: reactivity, recovery or AUCi on associations between chronic stress weight groups and food intake

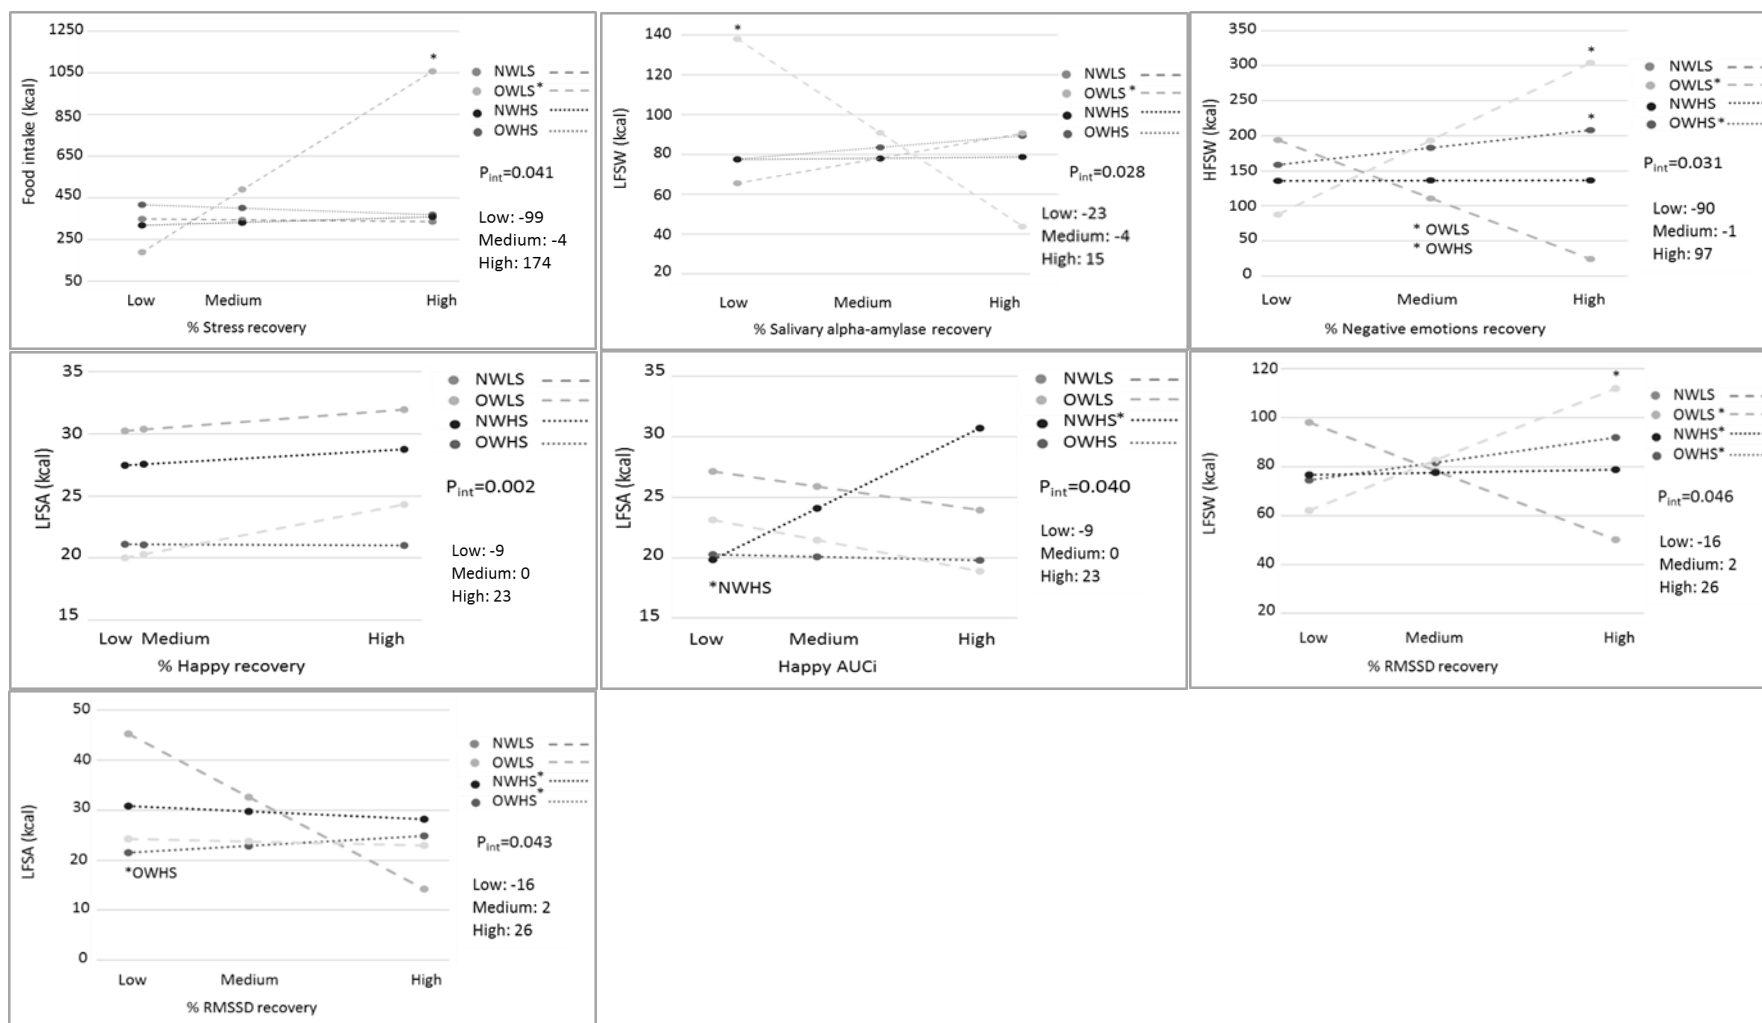

Significant group differences are presented for the stress recovery/AUCi versus food intake relation or for food intake differences at specific stress reactivity levels, with NWLS as reference group.  $P_{int}$ = p-value of the group\*reactivity interaction; NWLS=Normal Weight Low Stress; OWLS=Overweight Low Stress; NWHS=Normal Weight High Stress; OWHS=Overweight High Stress; HF: high fat; LF: low fat; SW: sweet; SA: savoury.
