# Supplementary material for: Stress Responsiveness and Emotional Eating Depend on Youngsters’ Chronic Stress Level and Overweight
Source: MDPI journal article supplement (doi:10.3390/nu13103654), 2021-10-19
Supplement: s1 [file s1]

Figure S2. Group differences in stress reactivity/recovery by repeated measures ANOVA.

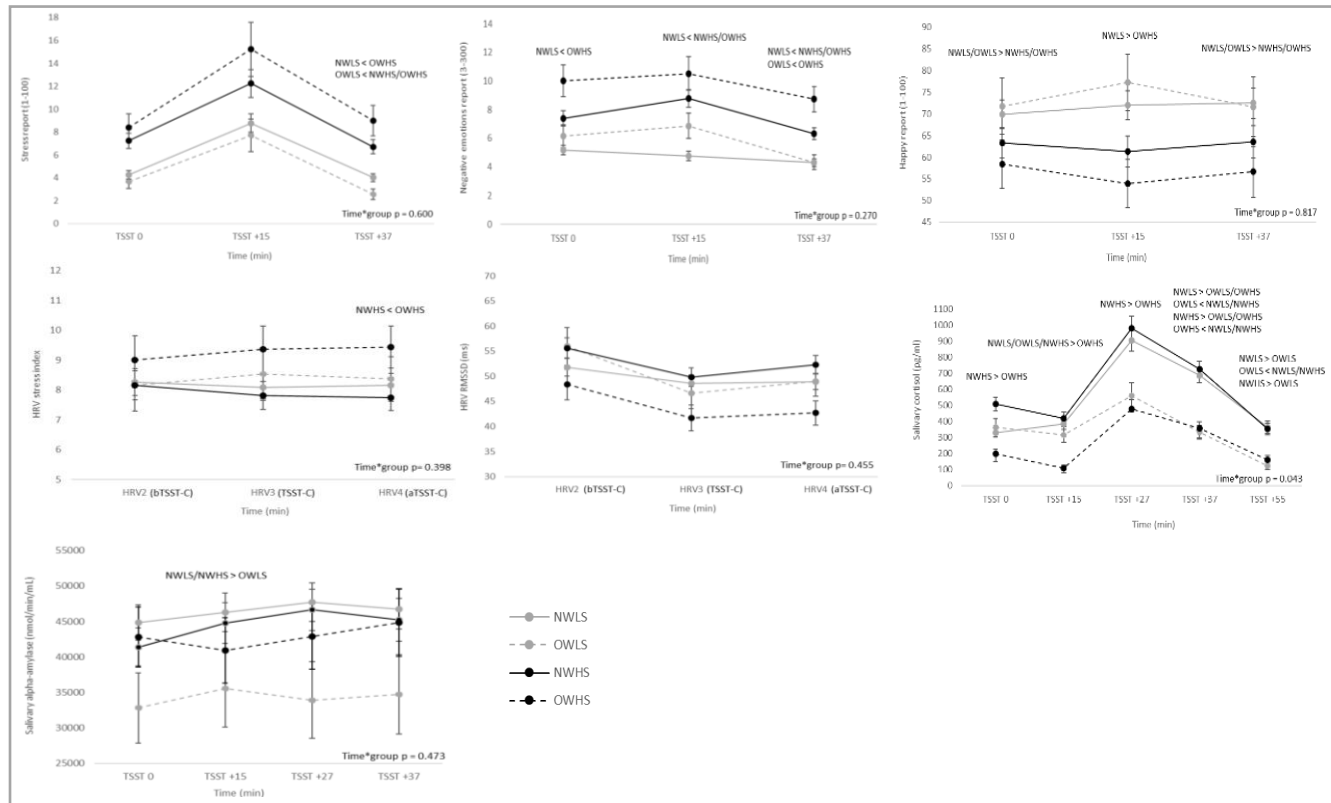

Differences (estimated marginal means and standard error) in stress reactivity/recovery between the four groups: Normal Weight Low Stress (NWLS), Overweight Low Stress (OWLS), Normal Weight High Stress (NWHS) and Overweight High Stress (OWHS) adolescents. Significant group differences ( $p < 0.05$ ) are visualized per stress parameter at the corresponding timepoint/interval. TSST-C: Trier Social Stress Test – Children; bTSST-C: before TSST-C; aTSST-C: after TSST-C; RMSSD: Root Mean Square of the Successive Differences.
