# Supplementary material for: Stress Responsiveness and Emotional Eating Depend on Youngsters’ Chronic Stress Level and Overweight
Source: MDPI journal article supplement (doi:10.3390/nu13103654), 2021-10-19
Supplement: s1 [file s1]

Table S2. Descriptive baseline data for continuous variables

| Variable data (n=137)                | Mean $\pm$ SD     | Median [p25;p75] | Minimum | Maximum  |
|--------------------------------------|-------------------|------------------|---------|----------|
| Body mass index z-score              | 0.4 $\pm$ 0.4     |                  | -2.227  | 3.539    |
| Perceived stress scale (0-40)        | 14.2 $\pm$ 2.0    |                  | 2.0     | 30.0     |
| Depressive symptoms (0-56)           | 9.0 $\pm$ 6.2     |                  | 0.0     | 27.0     |
| Hair cortisol (pg/mg)                |                   | 2.6 [1.9; 3.7]   | 1.570   | 51.135   |
| Age                                  | 14.2 $\pm$ 2.0    |                  | 6       | 18       |
| Trait emotional eating (13-65)       | 27.7 $\pm$ 11.8   |                  | 13.0    | 65.0     |
| Stress report (1-100)                |                   | 10 [1; 20]       | 1       | 72       |
| Negative emotions report (3-300)     |                   | 3 [3; 15]        | 3       | 139      |
| Happy report (1-100)                 | 66.1 $\pm$ 23.7   |                  | 1       | 100      |
| HRV RMSSD (ms)                       |                   | 51 [39; 76]      | 14.2    | 263.3    |
| HRV stress index                     | 8.3 $\pm$ 3.1     |                  | 2.8     | 21.6     |
| Salivary cortisol (pg/ml)            |                   | 311 [115; 693]   | 8.2     | 3523.2   |
| Salivary alpha-amylase (nmol/min/ml) | 43903 $\pm$ 19562 |                  | 7736.6  | 124915.7 |
| Hunger (1-100)                       | 16.4 $\pm$ 20.2   |                  | 1       | 90       |
| Liking (12-1200)                     | 743.9 $\pm$ 162.3 |                  | 227     | 1081     |
| Wanting (12-1200)                    | 410.0 $\pm$ 235.8 |                  | 12      | 885      |

HRV: heart rate variability; RMSSD: Root Mean Square of the Successive Differences
