# Supplementary material for: Stress Responsiveness and Emotional Eating Depend on Youngsters’ Chronic Stress Level and Overweight
Source: MDPI journal article supplement (doi:10.3390/nu13103654), 2021-10-19
Supplement: s1 [file s1]

Table S1. Used food items with corresponding food category and nutrient composition per 100 gram

| Food category    | Food item                          | Energy (kcal) | Fat (g) | Fat (kcal) | Sugars (g) | Sugars (kcal) | Sodium (mg) | Total energy per portion (kcal) |
|------------------|------------------------------------|---------------|---------|------------|------------|---------------|-------------|---------------------------------|
| Low Fat Sweet    | White grapes                       | 71            | 0.3     | 2.7        | 13.3       | 53.2          | 1           | 35.5                            |
|                  | Sweetened cornflakes (Honey Loops) | 391           | 3.5     | 31.5       | 27         | 108           | 400         | 195.5                           |
|                  | Gummy bears                        | 343           | 0.5     | 4.5        | 46         | 184           | 30          | 171.5                           |
| High Fat Sweet   | Brown chocolate                    | 449           | 17.1    | 153.9      | 55         | 220           | 58          | 224.5                           |
|                  | Chocolate chip cookies             | 510           | 26      | 234        | 31         | 124           | 320         | 255                             |
|                  | M&M's                              | 501           | 20.9    | 187.9      | 67.8       | 271.2         | 200         | 250.5                           |
| Low Fat Savoury  | Salted pretzel sticks              | 347           | 0.5     | 4.5        | 2.3        | 9.2           | 2720        | 173.5                           |
|                  | Puffed Rice Cakes                  | 380           | 3.8     | 34.2       | 2.5        | 10            | 75          | 190                             |
|                  | Crisp bread                        | 372           | 5.26    | 47.34      | 1.6        | 6.4           | 750         | 186                             |
| High Fat Savoury | Salted chips                       | 539           | 35      | 315        | 0.5        | 2             | 480         | 269.5                           |
|                  | Roasted & salted peanuts           | 600           | 50      | 450        | 3.1        | 12.4          | 680         | 300                             |
|                  | TUC salted crackers                | 486           | 22      | 198        | 7.2        | 28.8          | 680         | 243                             |
