# Supplementary material for: Stress Responsiveness and Emotional Eating Depend on Youngsters’ Chronic Stress Level and Overweight
Source: MDPI journal article supplement (doi:10.3390/nu13103654), 2021-10-19
Supplement: s1 [file s1]

Table S7. Linear regression with continuous trait emotional eating as predictor and state emotional eating as outcome

|                                | Trait emotional eating |       |
|--------------------------------|------------------------|-------|
|                                | $\beta$                | p     |
| Increase in hunger             | -0.105                 | 0.257 |
| Increase in wanting            | -0.108                 | 0.233 |
| Food intake (kcal)             | 0.060                  | 0.499 |
| Energy density intake (kcal/g) | 0.112                  | 0.204 |
| HFSW intake (kcal)             | 0.067                  | 0.460 |
| LFSW intake (kcal)             | 0.024                  | 0.787 |
| HFSA intake (kcal)             | 0.070                  | 0.458 |
| LFSA intake (kcal)             | -0.101                 | 0.303 |

Linear regression with continuous trait emotional eating as predictor and state emotional eating as outcome. Standardized regression coefficients were adjusted for age, gender and parental education, hunger at study start and liking of presented food. HF: high fat; LF: low fat; SW: sweet; SA: savoury.
