# Supplementary material for: Stress Responsiveness and Emotional Eating Depend on Youngsters’ Chronic Stress Level and Overweight
Source: MDPI journal article supplement (doi:10.3390/nu13103654), 2021-10-19
Supplement: s1 [file s1]

Table S3. Spearman Correlation

[illegible]

The overall chronic stress score was correlated with BMI z-score ( $r=0.29$ ). Trait emotional eating seemed significantly reflected in reported food wanting ( $r=0.19$ ) but not in the snack buffet intake (overall or category specific). Expected correlations were seen between the stress response parameters e.g. reverse correlations between RMSSD and stress index; positive correlations between negative emotions and self-reported stress; positive correlations for sCortisol with self-reported stress and the stress index while negative with RMSSD. Also, food parameters (overall and categories) showed significant mutual positive correlations. Overall liking of the presented snacks was not associated with overall snack buffet intake nor hunger. Hunger was related to consumed calories. BMI was negatively associated with wanting and hunger (before or after stress induction) and with overall liking, while chronic stress was only negatively associated with liking. As expected, the increase in wanting was associated with higher overall kcal intake of the snack buffet and with LFSW, LFSA, HFSA snack categories but not with total liking. As expected, no significant correlations were found between hair cortisol and salivary cortisol reactivity.
