# Supplementary material for: Stress Responsiveness and Emotional Eating Depend on Youngsters’ Chronic Stress Level and Overweight
Source: MDPI journal article supplement (doi:10.3390/nu13103654), 2021-10-19
Supplement: s1 [file s1]

Figure S1. Repeated measures ANOVA with time as within-subject factor

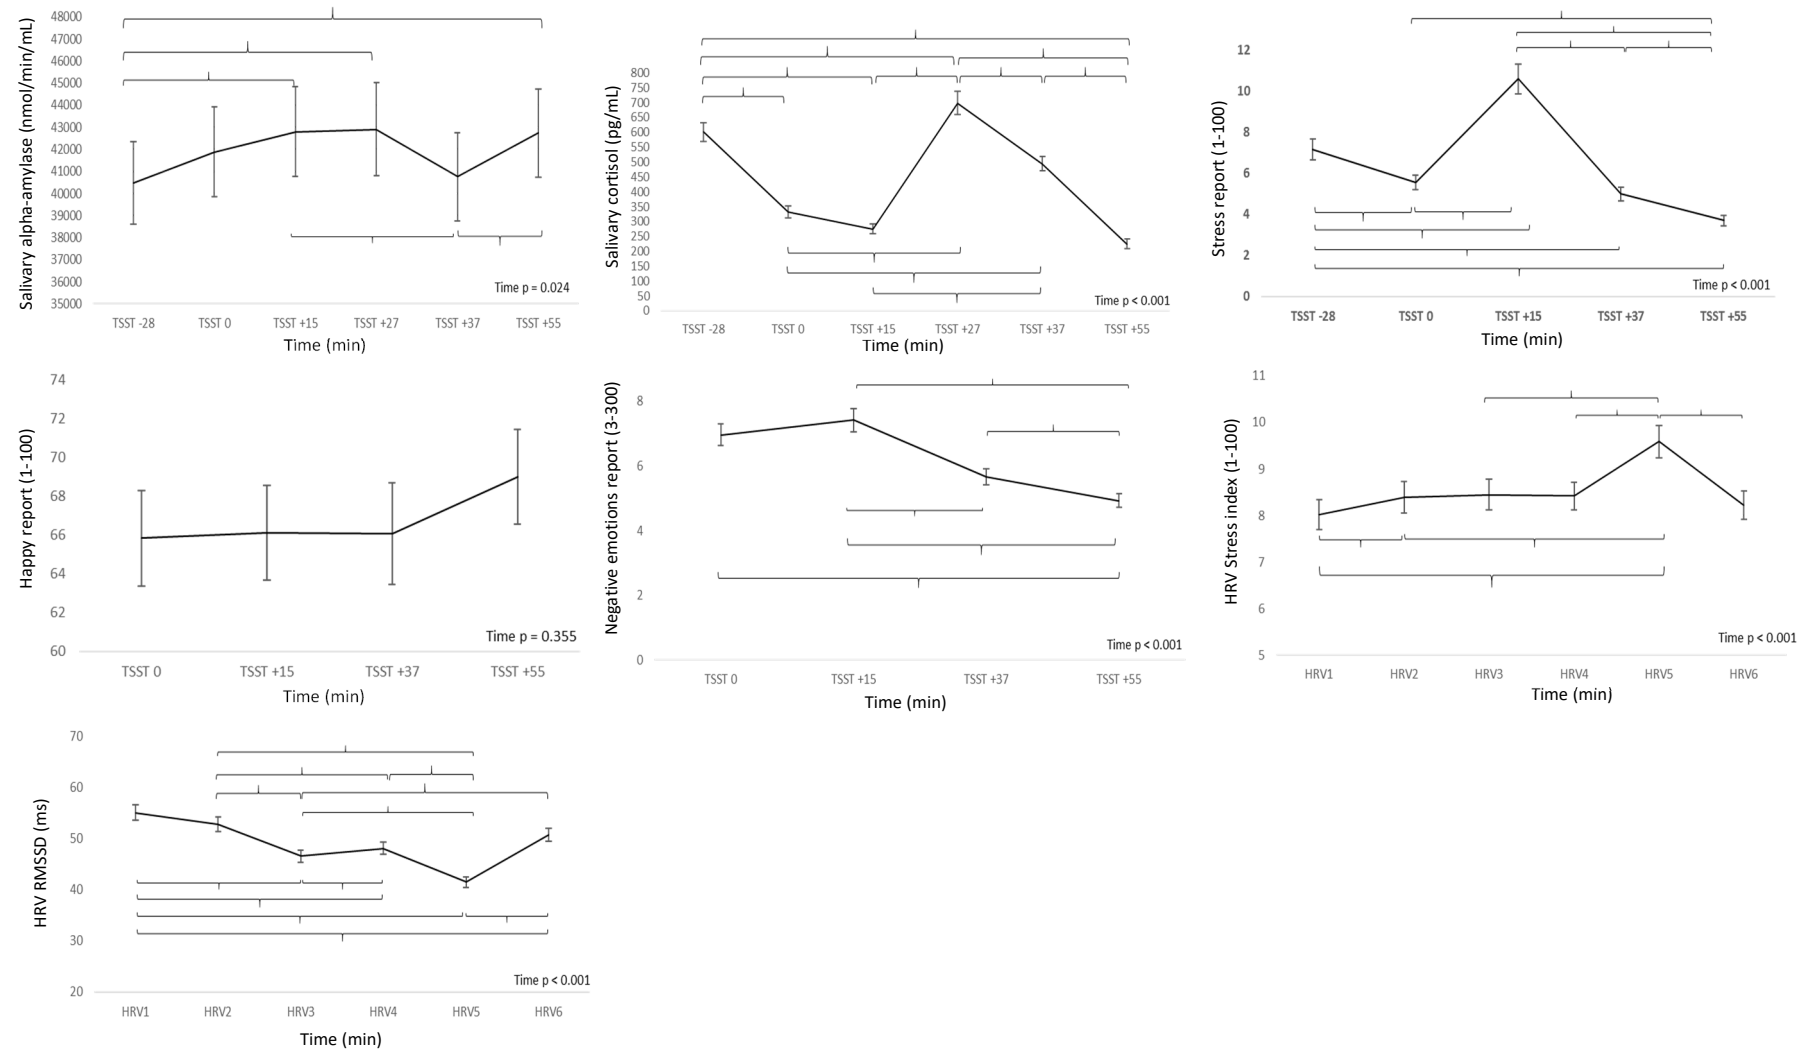

RMSSD: Root Mean Square of the Successive Differences; HRV: heart rate variability. HRV1 and HRV2 were taken before the Trier social stress test for children (TSST-C), HRV3 during the TSST-C, HRV4 between the TSST-C and the food lab, HRV5 during the food lab and HRV6 after the food lab. Horizontal brackets show significant changes ( $p \leq 0.05$ ) over the different time points.
