# Supplementary material for: Stress Responsiveness and Emotional Eating Depend on Youngsters’ Chronic Stress Level and Overweight
Source: MDPI journal article supplement (doi:10.3390/nu13103654), 2021-10-19
Supplement: s1 [file s1]

Table S5. Moderating effects of stress measures: reactivity, recovery or AUCi on associations between chronic stress weight groups and food intake

|                                |                                  | Moderator         |            |               |                    |        |
|--------------------------------|----------------------------------|-------------------|------------|---------------|--------------------|--------|
|                                |                                  | % stress increase |            |               |                    |        |
| Food lab responses             |                                  | $b_{int}$         | $SE_{int}$ | $p_{int}$     | $\Delta R^2_{int}$ | $R^2$  |
| Food intake (kcal)             | Overweight & low stress n=16     | 0.0028            | 0.0527     | 0.9582        |                    |        |
|                                | Normal weight & high stress n=45 | 0.0710            | 0.0316     | 0.0264        |                    |        |
|                                | Overweight & high stress n=23    | 0.0313            | 0.0330     | 0.3450        |                    |        |
|                                | Total model                      |                   |            | 0.1564        | 0.0384             | 0.1762 |
| Energy density intake (kcal/g) | Overweight & low stress n=16     | 0.0000            | 0.0001     | 0.7829        |                    |        |
|                                | Normal weight & high stress n=45 | 0.0000            | 0.0001     | 0.8833        |                    |        |
|                                | Overweight & high stress n=23    | 0.0001            | 0.0001     | 0.4686        |                    |        |
|                                | Total model                      |                   |            | 0.8696        | 0.8696             | 0.1640 |
| HFSW intake (kcal)             | Overweight & low stress n=16     | 0.0015            | 0.0247     | 0.9512        |                    |        |
|                                | Normal weight & high stress n=45 | 0.0276            | 0.0148     | 0.0649        |                    |        |
|                                | Overweight & high stress n=23    | 0.0071            | 0.0155     | 0.6477        |                    |        |
|                                | Total model                      |                   |            | 0.3118        | 0.0255             | 0.1940 |
| LFSW intake (kcal)             | Overweight & low stress n=16     | 0.0001            | 0.0138     | 0.9916        |                    |        |
|                                | Normal weight & high stress n=45 | 0.0224            | 0.0082     | <b>0.0075</b> |                    |        |
|                                | Overweight & high stress n=23    | 0.0124            | 0.0086     | 0.1541        |                    |        |
|                                | Total model                      |                   |            | <b>0.0481</b> | 0.0587             | 0.1785 |
| HFSA intake (kcal)             | Overweight & low stress n=16     | 0.0089            | 0.0341     | 0.7944        |                    |        |
|                                | Normal weight & high stress n=45 | 0.0181            | 0.0162     | 0.2654        |                    |        |
|                                | Overweight & high stress n=23    | 0.0120            | 0.0169     | 0.4787        |                    |        |
|                                | Total model                      |                   |            | 0.7109        | 0.0113             | 0.1076 |
| LFSA intake (kcal)             | Overweight & low stress n=16     | 0.0064            | 0.0086     | 0.4573        |                    |        |
|                                | Normal weight & high stress n=45 | 0.0011            | 0.0041     | 0.7799        |                    |        |
|                                | Overweight & high stress n=23    | -0.0001           | 0.0043     | 0.9856        |                    |        |
|                                | Total model                      |                   |            | 0.8935        | 0.0055             | 0.0391 |
|                                |                                  | % stress recovery |            |               |                    |        |
| Food lab responses             |                                  | $b_{int}$         | $SE_{int}$ | $p_{int}$     | $\Delta R^2_{int}$ | $R^2$  |
| Food intake (kcal)             | Overweight & low stress n=16     | 3.2217            | 1.3234     | <b>0.0165</b> |                    |        |
|                                | Normal weight & high stress n=45 | 0.1953            | 0.5514     | 0.7238        |                    |        |

|                                       |                                  |                        |                         |                        |                                     |                      |
|---------------------------------------|----------------------------------|------------------------|-------------------------|------------------------|-------------------------------------|----------------------|
|                                       | Overweight & high stress n=23    | -0.1366                | 0.5772                  | 0.8134                 |                                     |                      |
|                                       | Total model                      |                        |                         | <b>0.0411</b>          | 0.0596                              | 0.2028               |
| <b>Energy density intake (kcal/g)</b> | Overweight & low stress n=16     | 0.0040                 | 0.0038                  | 0.2890                 |                                     |                      |
|                                       | Normal weight & high stress n=45 | -0.0008                | 0.0016                  | 0.6080                 |                                     |                      |
|                                       | Overweight & high stress n=23    | -0.0011                | 0.0016                  | 0.5046                 |                                     |                      |
|                                       | Total model                      |                        |                         | 0.4831                 | 0.0175                              | 0.1918               |
| <b>HFSW intake (kcal)</b>             | Overweight & low stress n=16     | 0.1520                 | 0.6309                  | 0.0705                 |                                     |                      |
|                                       | Normal weight & high stress n=45 | 0.0544                 | 0.2629                  | 0.8365                 |                                     |                      |
|                                       | Overweight & high stress n=23    | -0.0514                | 0.2752                  | 0.8521                 |                                     |                      |
|                                       | Total model                      |                        |                         | 0.2063                 | 0.0328                              | 0.1942               |
| <b>LFSW intake (kcal)</b>             | Overweight & low stress n=16     | 0.7198                 | 0.3516                  | 0.0429                 |                                     |                      |
|                                       | Normal weight & high stress n=45 | -0.0830                | 0.1465                  | 0.5722                 |                                     |                      |
|                                       | Overweight & high stress n=23    | -0.1512                | 0.1534                  | 0.3262                 |                                     |                      |
|                                       | Total model                      |                        |                         | 0.0512                 | 0.0576                              | 0.1786               |
| <b>HFSA intake (kcal)</b>             | Overweight & low stress n=16     | 1.4372                 | 0.7296                  | 0.0514                 |                                     |                      |
|                                       | Normal weight & high stress n=45 | 0.4330                 | 0.2823                  | 0.1279                 |                                     |                      |
|                                       | Overweight & high stress n=23    | 0.2706                 | 0.2953                  | 0.3615                 |                                     |                      |
|                                       | Total model                      |                        |                         | 0.1175                 | 0.0476                              | 0.1368               |
| <b>LFSA intake (kcal)</b>             | Overweight & low stress n=16     | -0.1358                | 0.1818                  | 0.4565                 |                                     |                      |
|                                       | Normal weight & high stress n=45 | -0.1838                | 0.0715                  | 0.0116                 |                                     |                      |
|                                       | Overweight & high stress n=23    | -0.1872                | 0.0748                  | 0.0138                 |                                     |                      |
|                                       | Total model                      |                        |                         | 0.0843                 | 0.0584                              | 0.0923               |
|                                       |                                  | <b>AUCi stress</b>     |                         |                        |                                     |                      |
| <b>Food lab responses</b>             |                                  | <b>b<sub>int</sub></b> | <b>SE<sub>int</sub></b> | <b>p<sub>int</sub></b> | <b>ΔR<sup>2</sup><sub>int</sub></b> | <b>R<sup>2</sup></b> |
| <b>Food intake (kcal)</b>             | Overweight & low stress n=16     | 0.2637                 | 0.3100                  | 0.3967                 |                                     |                      |
|                                       | Normal weight & high stress n=45 | -0.0293                | 0.2684                  | 0.9132                 |                                     |                      |
|                                       | Overweight & high stress n=23    | 0.0366                 | 0.3242                  | 0.9104                 |                                     |                      |
|                                       | Total model                      |                        |                         | 0.7652                 | 0.0086                              | 0.1482               |
| <b>Energy density intake (kcal/g)</b> | Overweight & low stress n=16     | -0.0001                | 0.0008                  | 0.9522                 |                                     |                      |
|                                       | Normal weight & high stress n=45 | -0.0010                | 0.0007                  | 0.1852                 |                                     |                      |
|                                       | Overweight & high stress n=23    | 0.0007                 | 0.0009                  | 0.4265                 |                                     |                      |
|                                       | Total model                      |                        |                         | 0.1585                 | 0.0370                              | 0.2013               |

|                                       |                                  |                                            |                         |                        |                                     |                      |
|---------------------------------------|----------------------------------|--------------------------------------------|-------------------------|------------------------|-------------------------------------|----------------------|
| <b>HFSW intake (kcal)</b>             | Overweight & low stress n=16     | 0.1303                                     | 0.1439                  | 0.3670                 |                                     |                      |
|                                       | Normal weight & high stress n=45 | 0.0108                                     | 0.1245                  | 0.9311                 |                                     |                      |
|                                       | Overweight & high stress n=23    | 0.2306                                     | 0.1505                  | 0.1282                 |                                     |                      |
|                                       | Total model                      |                                            |                         | 0.3112                 | 0.0259                              | 0.1841               |
| <b>LFSW intake (kcal)</b>             | Overweight & low stress n=16     | 0.0397                                     | 0.0817                  | 0.6280                 |                                     |                      |
|                                       | Normal weight & high stress n=45 | -0.0392                                    | 0.0707                  | 0.5800                 |                                     |                      |
|                                       | Overweight & high stress n=23    | -0.0721                                    | 0.0854                  | 0.4001                 |                                     |                      |
|                                       | Total model                      |                                            |                         | 0.6051                 | 0.0140                              | 0.1373               |
| <b>HFSA intake (kcal)</b>             | Overweight & low stress n=16     | 0.1891                                     | 0.3048                  | 0.5363                 |                                     |                      |
|                                       | Normal weight & high stress n=45 | 0.0433                                     | 0.1369                  | 0.7525                 |                                     |                      |
|                                       | Overweight & high stress n=23    | -0.0779                                    | 0.1647                  | 0.6374                 |                                     |                      |
|                                       | Total model                      |                                            |                         | 0.7763                 | 0.0092                              | 0.0920               |
| <b>LFSA intake (kcal)</b>             | Overweight & low stress n=16     | -0.0751                                    | 0.0771                  | 0.3324                 |                                     |                      |
|                                       | Normal weight & high stress n=45 | -0.0230                                    | 0.0338                  | 0.4974                 |                                     |                      |
|                                       | Overweight & high stress n=23    | -0.0430                                    | 0.0408                  | 0.2944                 |                                     |                      |
|                                       | Total model                      |                                            |                         | 0.6478                 | 0.0147                              | 0.0570               |
|                                       |                                  | <b>% Salivary alpha-amylase reactivity</b> |                         |                        |                                     |                      |
| <b>Food lab responses</b>             |                                  | <b>b<sub>int</sub></b>                     | <b>SE<sub>int</sub></b> | <b>p<sub>int</sub></b> | <b>ΔR<sup>2</sup><sub>int</sub></b> | <b>R<sup>2</sup></b> |
| <b>Food intake (kcal)</b>             | Overweight & low stress n=16     | -1.4383                                    | 4.4548                  | 0.7474                 |                                     |                      |
|                                       | Normal weight & high stress n=45 | 0.3573                                     | 2.7556                  | 0.8971                 |                                     |                      |
|                                       | Overweight & high stress n=23    | -2.6382                                    | 3.9225                  | 0.5026                 |                                     |                      |
|                                       | Total model                      |                                            |                         | 0.8792                 | 0.0051                              | 0.1426               |
| <b>Energy density intake (kcal/g)</b> | Overweight & low stress n=16     | -0.0135                                    | 0.0123                  | 0.2772                 |                                     |                      |
|                                       | Normal weight & high stress n=45 | 0.0023                                     | 0.0076                  | 0.7635                 |                                     |                      |
|                                       | Overweight & high stress n=23    | 0.0003                                     | 0.0109                  | 0.9801                 |                                     |                      |
|                                       | Total model                      |                                            |                         | 0.6492                 | 0.0119                              | 0.1749               |
| <b>HFSW intake (kcal)</b>             | Overweight & low stress n=16     | -1.8939                                    | 2.0833                  | 0.3652                 |                                     |                      |
|                                       | Normal weight & high stress n=45 | -0.4146                                    | 1.2886                  | 0.7482                 |                                     |                      |
|                                       | Overweight & high stress n=23    | -0.3542                                    | 1.8344                  | 0.8472                 |                                     |                      |
|                                       | Total model                      |                                            |                         | 0.8418                 | 0.0061                              | 0.1660               |
| <b>LFSW intake (kcal)</b>             | Overweight & low stress n=16     | 0.8592                                     | 1.1738                  | 0.4657                 |                                     |                      |
|                                       | Normal weight & high stress n=45 | 0.3643                                     | 0.7261                  | 0.6168                 |                                     |                      |

|                                |                                  |                                   |                         |                        |                                     |                      |
|--------------------------------|----------------------------------|-----------------------------------|-------------------------|------------------------|-------------------------------------|----------------------|
|                                | Overweight & high stress n=23    | -0.4633                           | 1.0335                  | 0.6548                 |                                     |                      |
|                                | Total model                      |                                   |                         | 0.7469                 | 0.0093                              | 0.1311               |
| HFSA intake (kcal)             | Overweight & low stress n=16     | -1.0320                           | 2.3793                  | 0.6654                 |                                     |                      |
|                                | Normal weight & high stress n=45 | -0.2326                           | 1.4368                  | 0.8717                 |                                     |                      |
|                                | Overweight & high stress n=23    | -2.0104                           | 1.9872                  | 0.3139                 |                                     |                      |
|                                | Total model                      |                                   |                         | 0.7741                 | 0.0093                              | 0.0917               |
| LFSA intake (kcal)             | Overweight & low stress n=16     | -0.0196                           | 0.6490                  | 0.9759                 |                                     |                      |
|                                | Normal weight & high stress n=45 | 0.4829                            | 0.3591                  | 0.1816                 |                                     |                      |
|                                | Overweight & high stress n=23    | 0.1617                            | 0.4916                  | 0.7429                 |                                     |                      |
|                                | Total model                      |                                   |                         | 0.5852                 | 0.0173                              | 0.0577               |
|                                |                                  | % Salivary alpha-amylase recovery |                         |                        |                                     |                      |
| Food lab responses             |                                  | <b>b<sub>int</sub></b>            | <b>SE<sub>int</sub></b> | <b>p<sub>int</sub></b> | <b>ΔR<sup>2</sup><sub>int</sub></b> | <b>R<sup>2</sup></b> |
| Food intake (kcal)             | Overweight & low stress n=16     | -5.9788                           | 4.0968                  | 0.1472                 |                                     |                      |
|                                | Normal weight & high stress n=45 | -1.4445                           | 2.0744                  | 0.4876                 |                                     |                      |
|                                | Overweight & high stress n=23    | 0.9354                            | 4.1555                  | 0.8223                 |                                     |                      |
|                                | Total model                      |                                   |                         | 0.4771                 | 0.0186                              | 0.1562               |
| Energy density intake (kcal/g) | Overweight & low stress n=16     | 0.0123                            | 0.0114                  | 0.2834                 |                                     |                      |
|                                | Normal weight & high stress n=45 | 0.0003                            | 0.0058                  | 0.9638                 |                                     |                      |
|                                | Overweight & high stress n=23    | -0.0053                           | 0.0115                  | 0.6450                 |                                     |                      |
|                                | Total model                      |                                   |                         | 0.6809                 | 0.0108                              | 0.1845               |
| HFSW intake (kcal)             | Overweight & low stress n=16     | 0.0085                            | 1.9135                  | 0.9965                 |                                     |                      |
|                                | Normal weight & high stress n=45 | 0.2883                            | 0.9689                  | 0.7666                 |                                     |                      |
|                                | Overweight & high stress n=23    | 3.3705                            | 1.9409                  | 0.8520                 |                                     |                      |
|                                | Total model                      |                                   |                         | 0.3877                 | 0.0219                              | 0.1813               |
| LFSW intake (kcal)             | Overweight & low stress n=16     | -3.1766                           | 1.0505                  | <b>0.0031</b>          |                                     |                      |
|                                | Normal weight & high stress n=45 | -0.6317                           | 0.5319                  | 0.2375                 |                                     |                      |
|                                | Overweight & high stress n=23    | -0.3634                           | 1.0656                  | 0.7337                 |                                     |                      |
|                                | Total model                      |                                   |                         | <b>0.0277</b>          | <b>0.0672</b>                       | 0.1901               |
| HFSA intake (kcal)             | Overweight & low stress n=16     | -2.7821                           | 2.2760                  | 0.2242                 |                                     |                      |
|                                | Normal weight & high stress n=45 | -0.9658                           | 1.0560                  | 0.3624                 |                                     |                      |
|                                | Overweight & high stress n=23    | -2.0920                           | 2.1068                  | 0.3229                 |                                     |                      |
|                                | Total model                      |                                   |                         | 0.4702                 | 0.0209                              | 0.1032               |

|                                |                                  |                                |            |           |                    |        |
|--------------------------------|----------------------------------|--------------------------------|------------|-----------|--------------------|--------|
| LFSA intake (kcal)             | Overweight & low stress n=16     | 0.1481                         | 0.5279     | 0.7796    |                    |        |
|                                | Normal weight & high stress n=45 | -0.1552                        | 0.2719     | 0.5694    |                    |        |
|                                | Overweight & high stress n=23    | -0.0764                        | 0.5335     | 0.8865    |                    |        |
|                                | Total model                      |                                |            | 0.9176    | 0.0046             | 0.0416 |
|                                |                                  | AUCi Salivary alpha-amylase    |            |           |                    |        |
| Food lab responses             |                                  | $b_{int}$                      | $SE_{int}$ | $p_{int}$ | $\Delta R^2_{int}$ | $R^2$  |
| Food intake (kcal)             | Overweight & low stress n=16     | -0.0025                        | 0.0015     | 0.1003    |                    |        |
|                                | Normal weight & high stress n=45 | 0.0001                         | 0.0004     | 0.7928    |                    |        |
|                                | Overweight & high stress n=23    | 0.0001                         | 0.0004     | 0.8677    |                    |        |
|                                | Total model                      |                                |            | 0.4046    | 0.0217             | 0.1595 |
| Energy density intake (kcal/g) | Overweight & low stress n=16     | 0.0000                         | 0.0000     | 0.5723    |                    |        |
|                                | Normal weight & high stress n=45 | 0.0000                         | 0.0000     | 0.4361    |                    |        |
|                                | Overweight & high stress n=23    | 0.0000                         | 0.0000     | 0.9885    |                    |        |
|                                | Total model                      |                                |            | 0.7905    | 0.0076             | 0.1662 |
| HFSW intake (kcal)             | Overweight & low stress n=16     | -0.0007                        | 0.0007     | 0.3489    |                    |        |
|                                | Normal weight & high stress n=45 | 0.0001                         | 0.0002     | 0.7461    |                    |        |
|                                | Overweight & high stress n=23    | 0.0002                         | 0.0002     | 0.3097    |                    |        |
|                                | Total model                      |                                |            | 0.5471    | 0.0154             | 0.1764 |
| LFSW intake (kcal)             | Overweight & low stress n=16     | -0.0008                        | 0.0004     | 0.0497    |                    |        |
|                                | Normal weight & high stress n=45 | 0.0001                         | 0.0001     | 0.1149    |                    |        |
|                                | Overweight & high stress n=23    | 0.0000                         | 0.0001     | 0.8390    |                    |        |
|                                | Total model                      |                                |            | 0.0780    | 0.0508             | 0.1712 |
| HFSA intake (kcal)             | Overweight & low stress n=16     | -0.0009                        | 0.0009     | 0.3170    |                    |        |
|                                | Normal weight & high stress n=45 | -0.0001                        | 0.0002     | 0.5500    |                    |        |
|                                | Overweight & high stress n=23    | -0.0001                        | 0.0002     | 0.4716    |                    |        |
|                                | Total model                      |                                |            | 0.6697    | 0.0129             | 0.0994 |
| LFSA intake (kcal)             | Overweight & low stress n=16     | 0.0000                         | 0.0002     | 0.9576    |                    |        |
|                                | Normal weight & high stress n=45 | 0.0000                         | 0.0000     | 0.7896    |                    |        |
|                                | Overweight & high stress n=23    | 0.0000                         | 0.0001     | 0.9762    |                    |        |
|                                | Total model                      |                                |            | 0.9941    | 0.0267             | 0.0603 |
|                                |                                  | % Salivary cortisol reactivity |            |           |                    |        |
| Food lab responses             |                                  | $b_{int}$                      | $SE_{int}$ | $p_{int}$ | $\Delta R^2_{int}$ | $R^2$  |

|                                       |                                  |                                     |                         |                        |                                     |                      |
|---------------------------------------|----------------------------------|-------------------------------------|-------------------------|------------------------|-------------------------------------|----------------------|
| <b>Food intake (kcal)</b>             | Overweight & low stress n=16     | -0.1208                             | 0.2164                  | 0.5779                 |                                     |                      |
|                                       | Normal weight & high stress n=45 | 0.0003                              | 0.0938                  | 0.9972                 |                                     |                      |
|                                       | Overweight & high stress n=23    | -0.0256                             | 0.0670                  | 0.7029                 |                                     |                      |
|                                       | Total model                      |                                     |                         | 0.9054                 | 0.0049                              | 0.1746               |
| <b>Energy density intake (kcal/g)</b> | Overweight & low stress n=16     | -0.0008                             | 0.0006                  | 0.1707                 |                                     |                      |
|                                       | Normal weight & high stress n=45 | -0.0003                             | 0.0003                  | 0.3231                 |                                     |                      |
|                                       | Overweight & high stress n=23    | -0.0001                             | 0.0002                  | 0.4768                 |                                     |                      |
|                                       | Total model                      |                                     |                         | 0.4783                 | 0.0202                              | 0.2320               |
| <b>HFSW intake (kcal)</b>             | Overweight & low stress n=16     | -0.0451                             | 0.1057                  | 0.6706                 |                                     |                      |
|                                       | Normal weight & high stress n=45 | 0.0000                              | 0.0458                  | 0.9999                 |                                     |                      |
|                                       | Overweight & high stress n=23    | -0.0093                             | 0.0327                  | 0.7768                 |                                     |                      |
|                                       | Total model                      |                                     |                         | 0.9570                 | 0.0027                              | 0.1973               |
| <b>LFSW intake (kcal)</b>             | Overweight & low stress n=16     | -0.0219                             | 0.0589                  | 0.7112                 |                                     |                      |
|                                       | Normal weight & high stress n=45 | 0.0226                              | 0.0255                  | 0.3783                 |                                     |                      |
|                                       | Overweight & high stress n=23    | -0.0103                             | 0.0182                  | 0.5742                 |                                     |                      |
|                                       | Total model                      |                                     |                         | 0.2323                 | 0.0375                              | 0.1829               |
| <b>HFSA intake (kcal)</b>             | Overweight & low stress n=16     | -0.0742                             | 0.1014                  | 0.4659                 |                                     |                      |
|                                       | Normal weight & high stress n=45 | -0.028                              | 0.044                   | 0.5260                 |                                     |                      |
|                                       | Overweight & high stress n=23    | -0.0165                             | 0.0314                  | 0.5995                 |                                     |                      |
|                                       | Total model                      |                                     |                         | 0.8529                 | 0.0077                              | 0.1097               |
| <b>LFSA intake (kcal)</b>             | Overweight & low stress n=16     | 0.0106                              | 0.0333                  | 0.7503                 |                                     |                      |
|                                       | Normal weight & high stress n=45 | 0.0146                              | 0.0183                  | 0.4266                 |                                     |                      |
|                                       | Overweight & high stress n=23    | 0.0151                              | 0.0159                  | 0.3456                 |                                     |                      |
|                                       | Total model                      |                                     |                         | 0.8178                 | 0.0102                              | 0.0491               |
|                                       |                                  | <b>% Salivary cortisol recovery</b> |                         |                        |                                     |                      |
| <b>Food lab responses</b>             |                                  | <b>b<sub>int</sub></b>              | <b>SE<sub>int</sub></b> | <b>p<sub>int</sub></b> | <b>ΔR<sup>2</sup><sub>int</sub></b> | <b>R<sup>2</sup></b> |
| <b>Food intake (kcal)</b>             | Overweight & low stress n=16     | 5.3823                              | 4.6385                  | 0.2494                 |                                     |                      |
|                                       | Normal weight & high stress n=45 | 0.2796                              | 0.8081                  | 0.7303                 |                                     |                      |
|                                       | Overweight & high stress n=23    | 0.1959                              | 0.8729                  | 0.8230                 |                                     |                      |
|                                       | Total model                      |                                     |                         | 0.7072                 | 0.0135                              | 0.2277               |
| <b>Energy density intake (kcal/g)</b> | Overweight & low stress n=16     | 0.0113                              | 0.0126                  | 0.3701                 |                                     |                      |
|                                       | Normal weight & high stress n=45 | -0.0036                             | 0.0022                  | 0.1004                 |                                     |                      |

|                                       |                                  |                               |                         |                        |                                     |                      |
|---------------------------------------|----------------------------------|-------------------------------|-------------------------|------------------------|-------------------------------------|----------------------|
|                                       | Overweight & high stress n=23    | -0.0012                       | 0.0024                  | 0.6227                 |                                     |                      |
|                                       | Total model                      |                               |                         | 0.2448                 | 0.0414                              | 0.2191               |
| <b>HFSW intake (kcal)</b>             | Overweight & low stress n=16     | 1.2981                        | 2.3810                  | 0.5871                 |                                     |                      |
|                                       | Normal weight & high stress n=45 | 0.1484                        | 0.4148                  | 0.7214                 |                                     |                      |
|                                       | Overweight & high stress n=23    | -0.0832                       | 0.4481                  | 0.8532                 |                                     |                      |
|                                       | Total model                      |                               |                         | 0.8865                 | 0.0064                              | 0.2021               |
| <b>LFSW intake (kcal)</b>             | Overweight & low stress n=16     | 1.4209                        | 1.2954                  | 0.2760                 |                                     |                      |
|                                       | Normal weight & high stress n=45 | 0.0727                        | 0.2257                  | 0.7482                 |                                     |                      |
|                                       | Overweight & high stress n=23    | -0.0107                       | 0.2438                  | 0.9651                 |                                     |                      |
|                                       | Total model                      |                               |                         | 0.7179                 | 0.0316                              | 0.1915               |
| <b>HFSA intake (kcal)</b>             | Overweight & low stress n=16     | 2.6913                        | 2.2808                  | 0.2417                 |                                     |                      |
|                                       | Normal weight & high stress n=45 | 0.1772                        | 0.3828                  | 0.6447                 |                                     |                      |
|                                       | Overweight & high stress n=23    | 0.2901                        | 0.0694                  | 0.7175                 |                                     |                      |
|                                       | Total model                      |                               |                         | 0.6223                 | 0.0192                              | 0.1795               |
| <b>LFSA intake (kcal)</b>             | Overweight & low stress n=16     | 0.4137                        | 0.6774                  | 0.5433                 |                                     |                      |
|                                       | Normal weight & high stress n=45 | 0.0137                        | 0.1214                  | 0.9602                 |                                     |                      |
|                                       | Overweight & high stress n=23    | 0.0160                        | 0.1273                  | 0.9002                 |                                     |                      |
|                                       | Total model                      |                               |                         | 0.9444                 | 0.0048                              | 0.0949               |
|                                       |                                  | <b>AUCi Salivary cortisol</b> |                         |                        |                                     |                      |
| <b>Food lab responses</b>             |                                  | <b>b<sub>int</sub></b>        | <b>SE<sub>int</sub></b> | <b>p<sub>int</sub></b> | <b>ΔR<sup>2</sup><sub>int</sub></b> | <b>R<sup>2</sup></b> |
| <b>Food intake (kcal)</b>             | Overweight & low stress n=16     | 0.0069                        | 0.0069                  | 0.3175                 |                                     |                      |
|                                       | Normal weight & high stress n=45 | 0.0008                        | 0.0010                  | 0.4541                 |                                     |                      |
|                                       | Overweight & high stress n=23    | 0.0015                        | 0.0039                  | 0.7038                 |                                     |                      |
|                                       | Total model                      |                               |                         | 0.6342                 | 0.0131                              | 0.1716               |
| <b>Energy density intake (kcal/g)</b> | Overweight & low stress n=16     | 0.0000                        | 0.0000                  | 0.6003                 |                                     |                      |
|                                       | Normal weight & high stress n=45 | 0.0000                        | 0.0000                  | 0.7362                 |                                     |                      |
|                                       | Overweight & high stress n=23    | 0.0000                        | 0.0000                  | 0.8392                 |                                     |                      |
|                                       | Total model                      |                               |                         | 0.9328                 | 0.0032                              | 0.2015               |
| <b>HFSW intake (kcal)</b>             | Overweight & low stress n=16     | -0.0001                       | 0.0032                  | 0.9841                 |                                     |                      |
|                                       | Normal weight & high stress n=45 | 0.0007                        | 0.0005                  | 0.1519                 |                                     |                      |
|                                       | Overweight & high stress n=23    | -0.0013                       | 0.0018                  | 0.4905                 |                                     |                      |
|                                       | Total model                      |                               |                         | 0.4711                 | 0.0189                              | 0.1891               |

|                                       |                                  |                                   |                         |                        |                                     |                      |
|---------------------------------------|----------------------------------|-----------------------------------|-------------------------|------------------------|-------------------------------------|----------------------|
| <b>LFSW intake (kcal)</b>             | Overweight & low stress n=16     | 0.0013                            | 0.0018                  | 0.4858                 |                                     |                      |
|                                       | Normal weight & high stress n=45 | 0                                 | 0.0003                  | 0.9484                 |                                     |                      |
|                                       | Overweight & high stress n=23    | 0.0008                            | 0.001                   | 0.4542                 |                                     |                      |
|                                       | Total model                      |                                   |                         | 0.7883                 | 0.0081                              | 0.1665               |
| <b>HFSA intake (kcal)</b>             | Overweight & low stress n=16     | 0.0077                            | 0.0036                  | 0.0342                 |                                     |                      |
|                                       | Normal weight & high stress n=45 | -0.0001                           | 0.0005                  | 0.8474                 |                                     |                      |
|                                       | Overweight & high stress n=23    | 0.002                             | 0.0019                  | 0.3055                 |                                     |                      |
|                                       | Total model                      |                                   |                         | 0.1341                 | 0.0473                              | 0.1373               |
| <b>LFSA intake (kcal)</b>             | Overweight & low stress n=16     | -0.0005                           | 0.0009                  | 0.5784                 |                                     |                      |
|                                       | Normal weight & high stress n=45 | 0.0002                            | 0.0001                  | 0.1586                 |                                     |                      |
|                                       | Overweight & high stress n=23    | 0.0000                            | 0.0005                  | 0.9956                 |                                     |                      |
|                                       | Total model                      |                                   |                         | 0.5104                 | 0.0215                              | 0.0662               |
|                                       |                                  | <b>% neg. emotions reactivity</b> |                         |                        |                                     |                      |
| <b>Food lab responses</b>             |                                  | <b>b<sub>int</sub></b>            | <b>SE<sub>int</sub></b> | <b>p<sub>int</sub></b> | <b>ΔR<sup>2</sup><sub>int</sub></b> | <b>R<sup>2</sup></b> |
| <b>Food intake (kcal)</b>             | Overweight & low stress n=16     | -0.6432                           | 0.5546                  | 0.2486                 |                                     |                      |
|                                       | Normal weight & high stress n=45 | 0.0044                            | 0.2554                  | 0.9863                 |                                     |                      |
|                                       | Overweight & high stress n=23    | -0.0623                           | 0.2469                  | 0.8014                 |                                     |                      |
|                                       | Total model                      |                                   |                         | 0.7034                 | 0.0104                              | 0.163                |
| <b>Energy density intake (kcal/g)</b> | Overweight & low stress n=16     | -0.0008                           | 0.0016                  | 0.6058                 |                                     |                      |
|                                       | Normal weight & high stress n=45 | -0.0004                           | 0.0007                  | 0.6156                 |                                     |                      |
|                                       | Overweight & high stress n=23    | -0.0006                           | 0.0007                  | 0.3776                 |                                     |                      |
|                                       | Total model                      |                                   |                         | 0.8177                 | 0.0068                              | 0.1656               |
| <b>HFSW intake (kcal)</b>             | Overweight & low stress n=16     | -0.2229                           | 0.2606                  | 0.3943                 |                                     |                      |
|                                       | Normal weight & high stress n=45 | 0.0618                            | 0.12                    | 0.6073                 |                                     |                      |
|                                       | Overweight & high stress n=23    | 0.0332                            | 0.116                   | 0.7753                 |                                     |                      |
|                                       | Total model                      |                                   |                         | 0.7494                 | 0.0088                              | 0.1777               |
| <b>LFSW intake (kcal)</b>             | Overweight & low stress n=16     | -0.1533                           | 0.1469                  | 0.2990                 |                                     |                      |
|                                       | Normal weight & high stress n=45 | -0.0374                           | 0.0677                  | 0.5819                 |                                     |                      |
|                                       | Overweight & high stress n=23    | -0.0551                           | 0.0654                  | 0.4013                 |                                     |                      |
|                                       | Total model                      |                                   |                         | 0.6713                 | 0.0117                              | 0.1425               |
| <b>HFSA intake (kcal)</b>             | Overweight & low stress n=16     | 1.1147                            | 3.2404                  | 0.7315                 |                                     |                      |
|                                       | Normal weight & high stress n=45 | -0.0655                           | 0.1309                  | 0.6177                 |                                     |                      |



|                                |                                  |                          |                         |                        |                                     |                      |
|--------------------------------|----------------------------------|--------------------------|-------------------------|------------------------|-------------------------------------|----------------------|
|                                | Overweight & high stress n=23    | -0.0616                  | 0.1263                  | 0.6266                 |                                     |                      |
|                                | Total model                      |                          |                         | 0.9263                 | 0.0039                              | 0.0948               |
| LFSA intake (kcal)             | Overweight & low stress n=16     | -0.151                   | 0.1245                  | 0.2277                 |                                     |                      |
|                                | Normal weight & high stress n=45 | -0.1111                  | 0.1101                  | 0.3151                 |                                     |                      |
|                                | Overweight & high stress n=23    | -0.1277                  | 0.1095                  | 0.2465                 |                                     |                      |
|                                | Total model                      |                          |                         | 0.6336                 | 0.0153                              | 0.0551               |
|                                |                                  | % neg. emotions recovery |                         |                        |                                     |                      |
| Food lab responses             |                                  | <b>b<sub>int</sub></b>   | <b>SE<sub>int</sub></b> | <b>p<sub>int</sub></b> | <b>ΔR<sup>2</sup><sub>int</sub></b> | <b>R<sup>2</sup></b> |
| Food intake (kcal)             | Overweight & low stress n=16     | 3.3269                   | 1.7504                  | 0.0599                 |                                     |                      |
|                                | Normal weight & high stress n=45 | 0.8209                   | 1.0511                  | 0.4364                 |                                     |                      |
|                                | Overweight & high stress n=23    | 0.693                    | 1.0727                  | 0.5196                 |                                     |                      |
|                                | Total model                      |                          |                         | 0.2778                 | 0.0283                              | 0.1741               |
| Energy density intake (kcal/g) | Overweight & low stress n=16     | 0.0109                   | 0.0048                  | 0.0247                 |                                     |                      |
|                                | Normal weight & high stress n=45 | 0.0067                   | 0.0029                  | 0.0211                 |                                     |                      |
|                                | Overweight & high stress n=23    | 0.0077                   | 0.0029                  | 0.0102                 |                                     |                      |
|                                | Total model                      |                          |                         | 0.0516                 | 0.0541                              | 0.2277               |
| HFSW intake (kcal)             | Overweight & low stress n=16     | 2.0542                   | 0.8031                  | <b>0.0118</b>          |                                     |                      |
|                                | Normal weight & high stress n=45 | 0.9069                   | 0.4822                  | 0.0626                 |                                     |                      |
|                                | Overweight & high stress n=23    | 1.1687                   | 0.4922                  | <b>0.0192</b>          |                                     |                      |
|                                | Total model                      |                          |                         | <b>0.0313</b>          | 0.0621                              | 0.2268               |
| LFSW intake (kcal)             | Overweight & low stress n=16     | 0.9621                   | 0.4625                  | 0.0397                 |                                     |                      |
|                                | Normal weight & high stress n=45 | 0.1841                   | 0.2777                  | 0.5088                 |                                     |                      |
|                                | Overweight & high stress n=23    | 0.1324                   | 0.2834                  | 0.6414                 |                                     |                      |
|                                | Total model                      |                          |                         | 0.1708                 | 0.0377                              | 0.1584               |
| HFSA intake (kcal)             | Overweight & low stress n=16     | -0.1302                  | 1.0494                  | 0.9015                 |                                     |                      |
|                                | Normal weight & high stress n=45 | -0.3008                  | 0.5335                  | 0.5740                 |                                     |                      |
|                                | Overweight & high stress n=23    | -0.6149                  | 0.5443                  | 0.2611                 |                                     |                      |
|                                | Total model                      |                          |                         | 0.3705                 | 0.0254                              | 0.0254               |
| LFSA intake (kcal)             | Overweight & low stress n=16     | 0.0624                   | 0.2458                  | 0.8002                 |                                     |                      |
|                                | Normal weight & high stress n=45 | -0.0028                  | 0.136                   | 0.9836                 |                                     |                      |
|                                | Overweight & high stress n=23    | -0.0254                  | 0.1386                  | 0.8549                 |                                     |                      |
|                                | Total model                      |                          |                         | 0.9551                 | 0.0029                              | 0.0379               |

|                                |                                  | AUCi neg. emotions |            |               |                    |        |
|--------------------------------|----------------------------------|--------------------|------------|---------------|--------------------|--------|
| Food lab responses             |                                  | $b_{int}$          | $SE_{int}$ | $p_{int}$     | $\Delta R^2_{int}$ | $R^2$  |
| Food intake (kcal)             | Overweight & low stress n=16     | 0.5713             | 0.4825     | 0.2389        |                    |        |
|                                | Normal weight & high stress n=45 | 0.0429             | 0.4034     | 0.9156        |                    |        |
|                                | Overweight & high stress n=23    | 0.1428             | 0.5068     | 0.7787        |                    |        |
|                                | Total model                      |                    |            | 0.5361        | 0.0162             | 0.1588 |
| Energy density intake (kcal/g) | Overweight & low stress n=16     | 0.0015             | 0.0013     | 0.2549        |                    |        |
|                                | Normal weight & high stress n=45 | 0.0000             | 0.0011     | 0.9908        |                    |        |
|                                | Overweight & high stress n=23    | 0.0006             | 0.0014     | 0.6524        |                    |        |
|                                | Total model                      |                    |            | 0.5065        | 0.0169             | 0.1795 |
| HFSW intake (kcal)             | Overweight & low stress n=16     | 0.4430             | 0.2239     | 0.0503        |                    |        |
|                                | Normal weight & high stress n=45 | 0.1053             | 0.1872     | 0.5751        |                    |        |
|                                | Overweight & high stress n=23    | 0.2113             | 0.2352     | 0.3710        |                    |        |
|                                | Total model                      |                    |            | 0.1818        | 0.0350             | 0.1942 |
| LFSW intake (kcal)             | Overweight & low stress n=16     | 0.1878             | 0.1275     | 0.1436        |                    |        |
|                                | Normal weight & high stress n=45 | 0.0445             | 0.1066     | 0.6771        |                    |        |
|                                | Overweight & high stress n=23    | 0.0368             | 0.1339     | 0.7840        |                    |        |
|                                | Total model                      |                    |            | 0.4302        | 0.0209             | 0.1425 |
| HFSA intake (kcal)             | Overweight & low stress n=16     | -0.0976            | 0.2495     | 0.6963        |                    |        |
|                                | Normal weight & high stress n=45 | 0.0583             | 0.2174     | 0.7891        |                    |        |
|                                | Overweight & high stress n=23    | -0.0583            | 0.2572     | 0.8211        |                    |        |
|                                | Total model                      |                    |            | 0.8864        | 0.0053             | 0.1043 |
| LFSA intake (kcal)             | Overweight & low stress n=16     | -0.0433            | 0.0632     | 0.4946        |                    |        |
|                                | Normal weight & high stress n=45 | -0.0484            | 0.0522     | 0.3557        |                    |        |
|                                | Overweight & high stress n=23    | -0.0657            | 0.0649     | 0.3134        |                    |        |
|                                | Total model                      |                    |            | 0.7614        | 0.0104             | 0.0517 |
|                                |                                  | % Happy reactivity |            |               |                    |        |
| Food lab responses             |                                  | $b_{int}$          | $SE_{int}$ | $p_{int}$     | $\Delta R^2_{int}$ | $R^2$  |
| Food intake (kcal)             | Overweight & low stress n=16     | -3.8715            | 2.6106     | 0.1408        |                    |        |
|                                | Normal weight & high stress n=45 | 0.4137             | 0.3790     | 0.2774        |                    |        |
|                                | Overweight & high stress n=23    | 0.1035             | 0.0464     | <b>0.0275</b> |                    |        |
|                                | Total model                      |                    |            | <b>0.0456</b> | 0.0575             | 0.2072 |

|                                       |                                  |                         |                         |                        |                                     |                      |
|---------------------------------------|----------------------------------|-------------------------|-------------------------|------------------------|-------------------------------------|----------------------|
| <b>Energy density intake (kcal/g)</b> | Overweight & low stress n=16     | 0.0075                  | 0.0074                  | 0.3151                 |                                     |                      |
|                                       | Normal weight & high stress n=45 | 0.0013                  | 0.0011                  | 0.2295                 |                                     |                      |
|                                       | Overweight & high stress n=23    | -0.0001                 | 0.0001                  | 0.5058                 |                                     |                      |
|                                       | Total model                      |                         |                         | 0.3965                 | 0.0213                              | 0.1910               |
| <b>HFSW intake (kcal)</b>             | Overweight & low stress n=16     | -1.2204                 | 1.2157                  | 0.3176                 |                                     |                      |
|                                       | Normal weight & high stress n=45 | 0.1577                  | 0.1765                  | 0.3735                 |                                     |                      |
|                                       | Overweight & high stress n=23    | 0.0619                  | 0.0216                  | <b>0.0049</b>          |                                     |                      |
|                                       | Total model                      |                         |                         | <b>0.0228</b>          | 0.0666                              | 0.2353               |
| <b>LFSW intake (kcal)</b>             | Overweight & low stress n=16     | -1.1506                 | 0.6944                  | 0.1003                 |                                     |                      |
|                                       | Normal weight & high stress n=45 | -0.0474                 | 0.1008                  | 0.6390                 |                                     |                      |
|                                       | Overweight & high stress n=23    | 0.0285                  | 0.0123                  | <b>0.0228</b>          |                                     |                      |
|                                       | Total model                      |                         |                         | <b>0.0426</b>          | 0.0606                              | 0.1812               |
| <b>HFSA intake (kcal)</b>             | Overweight & low stress n=16     | -1.3522                 | 1.3535                  | 0.3200                 |                                     |                      |
|                                       | Normal weight & high stress n=45 | 0.1638                  | 0.1967                  | 0.4068                 |                                     |                      |
|                                       | Overweight & high stress n=23    | 0.0133                  | 0.0240                  | 0.5809                 |                                     |                      |
|                                       | Total model                      |                         |                         | 0.5796                 | 0.0159                              | 0.1245               |
| <b>LFSA intake (kcal)</b>             | Overweight & low stress n=16     | -0.2062                 | 0.3371                  | 0.5420                 |                                     |                      |
|                                       | Normal weight & high stress n=45 | 0.1316                  | 0.0481                  | 0.0073                 |                                     |                      |
|                                       | Overweight & high stress n=23    | -0.0003                 | 0.0059                  | 0.9594                 |                                     |                      |
|                                       | Total model                      |                         |                         | 0.0545                 | 0.0664                              | 0.1048               |
|                                       |                                  | <b>% Happy recovery</b> |                         |                        |                                     |                      |
| <b>Food lab responses</b>             |                                  | <b>b<sub>int</sub></b>  | <b>SE<sub>int</sub></b> | <b>p<sub>int</sub></b> | <b>ΔR<sup>2</sup><sub>int</sub></b> | <b>R<sup>2</sup></b> |
| <b>Food intake (kcal)</b>             | Overweight & low stress n=16     | 1.4273                  | 2.0866                  | 0.4953                 |                                     |                      |
|                                       | Normal weight & high stress n=45 | -1.5672                 | 0.9686                  | 0.1084                 |                                     |                      |
|                                       | Overweight & high stress n=23    | -1.6305                 | 0.9683                  | 0.0950                 |                                     |                      |
|                                       | Total model                      |                         |                         | 0.1389                 | 0.0402                              | 0.1823               |
| <b>Energy density intake (kcal/g)</b> | Overweight & low stress n=16     | -0.0038                 | 0.0059                  | 0.5278                 |                                     |                      |
|                                       | Normal weight & high stress n=45 | -0.0025                 | 0.0028                  | 0.3688                 |                                     |                      |
|                                       | Overweight & high stress n=23    | -0.0024                 | 0.0028                  | 0.3878                 |                                     |                      |
|                                       | Total model                      |                         |                         | 0.8123                 | 0.0007                              | 0.1660               |
| <b>HFSW intake (kcal)</b>             | Overweight & low stress n=16     | 0.785                   | 0.9959                  | 0.4322                 |                                     |                      |
|                                       | Normal weight & high stress n=45 | -0.197                  | 0.4623                  | 0.6708                 |                                     |                      |

|                                       |                                  |                        |                         |                        |                                     |                      |
|---------------------------------------|----------------------------------|------------------------|-------------------------|------------------------|-------------------------------------|----------------------|
|                                       | Overweight & high stress n=23    | -0.1984                | 0.4622                  | 0.6686                 |                                     |                      |
|                                       | Total model                      |                        |                         | 0.7107                 | 0.0100                              | 0.1715               |
| <b>LFSW intake (kcal)</b>             | Overweight & low stress n=16     | 0.5802                 | 0.5553                  | 0.2983                 |                                     |                      |
|                                       | Normal weight & high stress n=45 | -0.2951                | 0.2578                  | 0.2548                 |                                     |                      |
|                                       | Overweight & high stress n=23    | -0.2927                | 0.2577                  | 0.2585                 |                                     |                      |
|                                       | Total model                      |                        |                         | 0.2353                 | 0.0320                              | 0.1544               |
| <b>HFSA intake (kcal)</b>             | Overweight & low stress n=16     | 0.1018                 | 1.1017                  | 0.9265                 |                                     |                      |
|                                       | Normal weight & high stress n=45 | -1.0389                | 0.4920                  | 0.0370                 |                                     |                      |
|                                       | Overweight & high stress n=23    | -1.0403                | 0.4919                  | 0.0367                 |                                     |                      |
|                                       | Total model                      |                        |                         | 0.1298                 | 0.0459                              | 0.1328               |
|                                       | Total model                      |                        |                         | <b>0.0013</b>          | 0.1258                              | 0.1606               |
| <b>LFSA intake (kcal)</b>             | Overweight & low stress n=16     | 0.1036                 | 0.5383                  | 0.8477                 |                                     |                      |
|                                       | Normal weight & high stress n=45 | -0.0173                | 0.1190                  | 0.8850                 |                                     |                      |
|                                       | Overweight & high stress n=23    | -0.0705                | 0.1191                  | 0.5551                 |                                     |                      |
|                                       | Total model                      |                        |                         | <b>0.0021</b>          | 0.1246                              | 0.1605               |
|                                       |                                  | <b>AUCi Happy</b>      |                         |                        |                                     |                      |
| <b>Food lab responses</b>             |                                  | <b>b<sub>int</sub></b> | <b>SE<sub>int</sub></b> | <b>p<sub>int</sub></b> | <b>ΔR<sup>2</sup><sub>int</sub></b> | <b>R<sup>2</sup></b> |
| <b>Food intake (kcal)</b>             | Overweight & low stress n=16     | 0.1378                 | 0.4103                  | 0.7376                 |                                     |                      |
|                                       | Normal weight & high stress n=45 | 0.2006                 | 0.2359                  | 0.3969                 |                                     |                      |
|                                       | Overweight & high stress n=23    | 0.5322                 | 0.3092                  | 0.0879                 |                                     |                      |
|                                       | Total model                      |                        |                         | 0.3615                 | 0.0234                              | 0.1752               |
| <b>Energy density intake (kcal/g)</b> | Overweight & low stress n=16     | 0.0005                 | 0.0012                  | 0.6410                 |                                     |                      |
|                                       | Normal weight & high stress n=45 | -0.0004                | 0.0007                  | 0.5568                 |                                     |                      |
|                                       | Overweight & high stress n=23    | 0.0000                 | 0.0009                  | 0.9784                 |                                     |                      |
|                                       | Total model                      |                        |                         | 0.8820                 | 0.0048                              | 0.1652               |
| <b>HFSW intake (kcal)</b>             | Overweight & low stress n=16     | -0.0017                | 0.1895                  | 0.9929                 |                                     |                      |
|                                       | Normal weight & high stress n=45 | 0.0073                 | 0.1090                  | 0.9465                 |                                     |                      |
|                                       | Overweight & high stress n=23    | 0.3098                 | 0.1428                  | 0.0321                 |                                     |                      |
|                                       | Total model                      |                        |                         | 0.1867                 | 0.0335                              | 0.2173               |

|                                       |                                  |                                  |                         |                        |                                     |                      |
|---------------------------------------|----------------------------------|----------------------------------|-------------------------|------------------------|-------------------------------------|----------------------|
| <b>LFSW intake (kcal)</b>             | Overweight & low stress n=16     | 0.0552                           | 0.1099                  | 0.6164                 |                                     |                      |
|                                       | Normal weight & high stress n=45 | 0.0091                           | 0.0632                  | 0.8857                 |                                     |                      |
|                                       | Overweight & high stress n=23    | 0.1195                           | 0.0828                  | 0.1517                 |                                     |                      |
|                                       | Total model                      |                                  |                         | 0.5248                 | 0.0170                              | 0.1369               |
| <b>HFSW intake (kcal)</b>             | Overweight & low stress n=16     | 0.0605                           | 0.2207                  | 0.7846                 |                                     |                      |
|                                       | Normal weight & high stress n=45 | 0.054                            | 0.1415                  | 0.7038                 |                                     |                      |
|                                       | Overweight & high stress n=23    | 0.0843                           | 0.1596                  | 0.5984                 |                                     |                      |
|                                       | Total model                      |                                  |                         | 0.9393                 | 0.0034                              | 0.0916               |
| <b>LFSA intake (kcal)</b>             | Overweight & low stress n=16     | -0.0082                          | 0.0729                  | 0.9101                 |                                     |                      |
|                                       | Normal weight & high stress n=45 | 0.1101                           | 0.0379                  | <b>0.0045</b>          |                                     |                      |
|                                       | Overweight & high stress n=23    | 0.0211                           | 0.0384                  | 0.5840                 |                                     |                      |
|                                       | Total model                      |                                  |                         | <b>0.0401</b>          | 0.0723                              | 0.1092               |
|                                       |                                  | <b>% Stress index reactivity</b> |                         |                        |                                     |                      |
| <b>Food lab responses</b>             |                                  | <b>b<sub>int</sub></b>           | <b>SE<sub>int</sub></b> | <b>p<sub>int</sub></b> | <b>ΔR<sup>2</sup><sub>int</sub></b> | <b>R<sup>2</sup></b> |
| <b>Food intake (kcal)</b>             | Overweight & low stress n=16     | 1.3611                           | 2.9998                  | 0.6509                 |                                     |                      |
|                                       | Normal weight & high stress n=45 | 1.1416                           | 1.8815                  | 0.5453                 |                                     |                      |
|                                       | Overweight & high stress n=23    | 2.9747                           | 3.1022                  | 0.3398                 |                                     |                      |
|                                       | Total model                      |                                  |                         | 0.8116                 | 0.0078                              | 0.1496               |
| <b>Energy density intake (kcal/g)</b> | Overweight & low stress n=16     | -0.0024                          | 0.0075                  | 0.7476                 |                                     |                      |
|                                       | Normal weight & high stress n=45 | 0.003                            | 0.0047                  | 0.5333                 |                                     |                      |
|                                       | Overweight & high stress n=23    | 0.0025                           | 0.0078                  | 0.7439                 |                                     |                      |
|                                       | Total model                      |                                  |                         | 0.8217                 | 0.0068                              | 0.2251               |
| <b>HFSW intake (kcal)</b>             | Overweight & low stress n=16     | -0.0626                          | 1.3736                  | 0.9638                 |                                     |                      |
|                                       | Normal weight & high stress n=45 | 0.4284                           | 0.8616                  | 0.6200                 |                                     |                      |
|                                       | Overweight & high stress n=23    | 2.2846                           | 1.4205                  | 0.1108                 |                                     |                      |
|                                       | Total model                      |                                  |                         | 0.4086                 | 0.0229                              | 0.1762               |
| <b>LFSW intake (kcal)</b>             | Overweight & low stress n=16     | 1.3735                           | 0.7864                  | 0.0837                 |                                     |                      |
|                                       | Normal weight & high stress n=45 | 0.5782                           | 0.4933                  | 0.2438                 |                                     |                      |
|                                       | Overweight & high stress n=23    | 0.2209                           | 0.8133                  | 0.7864                 |                                     |                      |

|                                       |                                  |                                |                         |                        |                                     |                      |
|---------------------------------------|----------------------------------|--------------------------------|-------------------------|------------------------|-------------------------------------|----------------------|
|                                       | Total model                      |                                |                         | 0.3387                 | 0.0282                              | 0.1302               |
| <b>HFSA intake (kcal)</b>             | Overweight & low stress n=16     | 0.0006                         | 1.5277                  | 0.9997                 |                                     |                      |
|                                       | Normal weight & high stress n=45 | 0.5614                         | 0.9399                  | 0.5517                 |                                     |                      |
|                                       | Overweight & high stress n=23    | 0.6936                         | 1.545                   | 0.6544                 |                                     |                      |
|                                       | Total model                      |                                |                         | 0.9178                 | 0.0045                              | 0.1016               |
| <b>LFSA intake (kcal)</b>             | Overweight & low stress n=16     | -0.1113                        | 0.3876                  | 0.7746                 |                                     |                      |
|                                       | Normal weight & high stress n=45 | -0.3645                        | 0.2434                  | 0.1374                 |                                     |                      |
|                                       | Overweight & high stress n=23    | -0.1647                        | 0.3922                  | 0.6754                 |                                     |                      |
|                                       | Total model                      |                                |                         | 0.4646                 | 0.0252                              | 0.0522               |
|                                       |                                  | <b>% Stress index recovery</b> |                         |                        |                                     |                      |
| <b>Food lab responses</b>             |                                  | <b>b<sub>int</sub></b>         | <b>SE<sub>int</sub></b> | <b>p<sub>int</sub></b> | <b>ΔR<sup>2</sup><sub>int</sub></b> | <b>R<sup>2</sup></b> |
| <b>Food intake (kcal)</b>             | Overweight & low stress n=16     | -4.3186                        | 3.57                    | 0.2291                 |                                     |                      |
|                                       | Normal weight & high stress n=45 | -5.9372                        | 2.408                   | 0.0153                 |                                     |                      |
|                                       | Overweight & high stress n=23    | -1.5027                        | 3.3324                  | 0.6530                 |                                     |                      |
|                                       | Total model                      |                                |                         | 0.0880                 | 0.0478                              | 0.2529               |
| <b>Energy density intake (kcal/g)</b> | Overweight & low stress n=16     | 0.0187                         | 0.0093                  | 0.0474                 |                                     |                      |
|                                       | Normal weight & high stress n=45 | -0.0005                        | 0.0063                  | 0.9305                 |                                     |                      |
|                                       | Overweight & high stress n=23    | 0.0056                         | 0.0087                  | 0.5174                 |                                     |                      |
|                                       | Total model                      |                                |                         | 0.1539                 | 0.0376                              | 0.2649               |
| <b>HFSW intake (kcal)</b>             | Overweight & low stress n=16     | -0.5653                        | 1.6094                  | 0.7261                 |                                     |                      |
|                                       | Normal weight & high stress n=45 | -2.3583                        | 1.0856                  | 0.0321                 |                                     |                      |
|                                       | Overweight & high stress n=23    | 0.6664                         | 1.5023                  | 0.6583                 |                                     |                      |
|                                       | Total model                      |                                |                         | 0.0637                 | 0.0501                              | 0.2984               |
| <b>LFSW intake (kcal)</b>             | Overweight & low stress n=16     | -1.5123                        | 0.9774                  | 0.1248                 |                                     |                      |
|                                       | Normal weight & high stress n=45 | -1.4216                        | 0.6593                  | 0.0333                 |                                     |                      |
|                                       | Overweight & high stress n=23    | -1.282                         | 0.9124                  | 0.1629                 |                                     |                      |
|                                       | Total model                      |                                |                         | 0.1610                 | 0.0417                              | 0.1666               |
| <b>HFSA intake (kcal)</b>             | Overweight & low stress n=16     | -0.3321                        | 0.343                   | 0.3353                 |                                     |                      |
|                                       | Normal weight & high stress n=45 | -0.2583                        | 0.2353                  | 0.2748                 |                                     |                      |
|                                       | Overweight & high stress n=23    | -0.0328                        | 0.3176                  | 0.9179                 |                                     |                      |
|                                       | Total model                      |                                |                         | 0.6210                 | 0.0157                              | 0.1199               |
| <b>LFSA intake (kcal)</b>             | Overweight & low stress n=16     | -0.6829                        | 0.4751                  | 0.1538                 |                                     |                      |

|                                       |                                  |                           |                         |                        |                                     |                      |
|---------------------------------------|----------------------------------|---------------------------|-------------------------|------------------------|-------------------------------------|----------------------|
|                                       | Normal weight & high stress n=45 | -0.5924                   | 0.3366                  | 0.0816                 |                                     |                      |
|                                       | Overweight & high stress n=23    | -0.8307                   | 0.4357                  | 0.0595                 |                                     |                      |
|                                       | Total model                      |                           |                         | 0.1796                 | 0.0458                              | 0.1114               |
|                                       |                                  | <b>AUCi Stress index</b>  |                         |                        |                                     |                      |
| <b>Food lab responses</b>             |                                  | <b>b<sub>int</sub></b>    | <b>SE<sub>int</sub></b> | <b>p<sub>int</sub></b> | <b>ΔR<sup>2</sup><sub>int</sub></b> | <b>R<sup>2</sup></b> |
| <b>Food intake (kcal)</b>             | Overweight & low stress n=16     | 0.1068                    | 2.9711                  | 0.9714                 |                                     |                      |
|                                       | Normal weight & high stress n=45 | -2.2977                   | 2.0047                  | 0.2543                 |                                     |                      |
|                                       | Overweight & high stress n=23    | 2.7856                    | 3.2502                  | 0.3934                 |                                     |                      |
|                                       | Total model                      |                           |                         | 0.2872                 | 0.0298                              | 0.1815               |
| <b>Energy density intake (kcal/g)</b> | Overweight & low stress n=16     | 0.0003                    | 0.0076                  | 0.9718                 |                                     |                      |
|                                       | Normal weight & high stress n=45 | -0.0006                   | 0.0051                  | 0.9072                 |                                     |                      |
|                                       | Overweight & high stress n=23    | 0.0067                    | 0.0083                  | 0.4201                 |                                     |                      |
|                                       | Total model                      |                           |                         | 0.8180                 | 0.0069                              | 0.2237               |
| <b>HFSW intake (kcal)</b>             | Overweight & low stress n=16     | -0.3867                   | 1.3593                  | 0.7766                 |                                     |                      |
|                                       | Normal weight & high stress n=45 | -0.9849                   | 0.9172                  | 0.2853                 |                                     |                      |
|                                       | Overweight & high stress n=23    | 2.5192                    | 1.487                   | 0.0932                 |                                     |                      |
|                                       | Total model                      |                           |                         | 0.0797                 | 0.0524                              | 0.2084               |
| <b>LFSW intake (kcal)</b>             | Overweight & low stress n=16     | -0.1174                   | 0.5341                  | 0.8264                 |                                     |                      |
|                                       | Normal weight & high stress n=45 | -0.1085                   | 0.866                   | 0.9006                 |                                     |                      |
|                                       | Overweight & high stress n=23    | 0.1419                    | 0.2653                  | 0.5938                 |                                     |                      |
|                                       | Total model                      |                           |                         | 0.5981                 | 0.0155                              | 0.1353               |
| <b>HFSA intake (kcal)</b>             | Overweight & low stress n=16     | -0.0496                   | 1.5262                  | 0.9741                 |                                     |                      |
|                                       | Normal weight & high stress n=45 | -0.4886                   | 1.028                   | 0.6356                 |                                     |                      |
|                                       | Overweight & high stress n=23    | 0.7165                    | 1.644                   | 0.6639                 |                                     |                      |
|                                       | Total model                      |                           |                         | 0.8614                 | 0.0067                              | 0.1086               |
| <b>LFSA intake (kcal)</b>             | Overweight & low stress n=16     | -0.2354                   | 0.3777                  | 0.5345                 |                                     |                      |
|                                       | Normal weight & high stress n=45 | -0.4896                   | 0.2595                  | 0.0622                 |                                     |                      |
|                                       | Overweight & high stress n=23    | -0.3379                   | 0.4092                  | 0.4109                 |                                     |                      |
|                                       | Total model                      |                           |                         | 0.6115                 | 0.0939                              | 0.0339               |
|                                       |                                  | <b>% RMSSD reactivity</b> |                         |                        |                                     |                      |
| <b>Food lab responses</b>             |                                  | <b>b<sub>int</sub></b>    | <b>SE<sub>int</sub></b> | <b>p<sub>int</sub></b> | <b>ΔR<sup>2</sup><sub>int</sub></b> | <b>R<sup>2</sup></b> |
| <b>Food intake (kcal)</b>             | Overweight & low stress n=16     | -0.0237                   | 2.8034                  | 0.9933                 |                                     |                      |

|                                       |                                  |                         |                         |                        |                                     |                      |
|---------------------------------------|----------------------------------|-------------------------|-------------------------|------------------------|-------------------------------------|----------------------|
|                                       | Normal weight & high stress n=45 | -1.3337                 | 1.5134                  | 0.3802                 |                                     |                      |
|                                       | Overweight & high stress n=23    | -2.8561                 | 2.8217                  | 0.3138                 |                                     |                      |
|                                       | Total model                      |                         |                         | 0.6945                 | 0.0117                              | 0.1525               |
| <b>Energy density intake (kcal/g)</b> | Overweight & low stress n=16     | 0.0090                  | 0.0070                  | 0.2010                 |                                     |                      |
|                                       | Normal weight & high stress n=45 | 0.0011                  | 0.0038                  | 0.7724                 |                                     |                      |
|                                       | Overweight & high stress n=23    | -0.0024                 | 0.0071                  | 0.7363                 |                                     |                      |
|                                       | Total model                      |                         |                         | 0.5457                 | 0.0157                              | 0.2328               |
| <b>HFSW intake (kcal)</b>             | Overweight & low stress n=16     | -0.2142                 | 1.2886                  | 0.8683                 |                                     |                      |
|                                       | Normal weight & high stress n=45 | -0.8203                 | 0.6956                  | 0.2410                 |                                     |                      |
|                                       | Overweight & high stress n=23    | -1.9714                 | 1.2970                  | 0.1315                 |                                     |                      |
|                                       | Total model                      |                         |                         | 0.4285                 | 0.022                               | 0.1727               |
| <b>LFSW intake (kcal)</b>             | Overweight & low stress n=16     | -0.7571                 | 0.7434                  | 0.3108                 |                                     |                      |
|                                       | Normal weight & high stress n=45 | -0.3263                 | 0.4013                  | 0.4180                 |                                     |                      |
|                                       | Overweight & high stress n=23    | -0.2424                 | 0.7482                  | 0.7466                 |                                     |                      |
|                                       | Total model                      |                         |                         | 0.7507                 | 0.0102                              | 0.1132               |
| <b>HFSA intake (kcal)</b>             | Overweight & low stress n=16     | 0.8965                  | 1.4375                  | 0.5343                 |                                     |                      |
|                                       | Normal weight & high stress n=45 | -0.334                  | 0.7566                  | 0.6599                 |                                     |                      |
|                                       | Overweight & high stress n=23    | -0.5832                 | 1.4065                  | 0.6793                 |                                     |                      |
|                                       | Total model                      |                         |                         | 0.7852                 | 0.0095                              | 0.1059               |
| <b>LFSA intake (kcal)</b>             | Overweight & low stress n=16     | -0.0607                 | 0.3592                  | 0.8663                 |                                     |                      |
|                                       | Normal weight & high stress n=45 | 0.097                   | 0.2                     | 0.6286                 |                                     |                      |
|                                       | Overweight & high stress n=23    | -0.1203                 | 0.3613                  | 0.7398                 |                                     |                      |
|                                       | Total model                      |                         |                         | 0.8421                 | 0.0082                              | 0.044                |
|                                       |                                  | <b>% RMSSD recovery</b> |                         |                        |                                     |                      |
| <b>Food lab responses</b>             |                                  | <b>b<sub>int</sub></b>  | <b>SE<sub>int</sub></b> | <b>p<sub>int</sub></b> | <b>ΔR<sup>2</sup><sub>int</sub></b> | <b>R<sup>2</sup></b> |
| <b>Food intake (kcal)</b>             | Overweight & low stress n=16     | 4.5226                  | 4.2356                  | 0.2881                 |                                     |                      |
|                                       | Normal weight & high stress n=45 | 4.1126                  | 1.9192                  | 0.0344                 |                                     |                      |
|                                       | Overweight & high stress n=23    | 3.3089                  | 2.7614                  | 0.2335                 |                                     |                      |
|                                       | Total model                      |                         |                         | 0.1978                 | 0.0358                              | 0.209                |
| <b>Energy density intake (kcal/g)</b> | Overweight & low stress n=16     | -0.018                  | 0.0108                  | 0.0999                 |                                     |                      |
|                                       | Normal weight & high stress n=45 | -0.0024                 | 0.0049                  | 0.6326                 |                                     |                      |
|                                       | Overweight & high stress n=23    | -0.0093                 | 0.0071                  | 0.1928                 |                                     |                      |



|                                       |                                  |                        |                         |                        |                                     |                      |
|---------------------------------------|----------------------------------|------------------------|-------------------------|------------------------|-------------------------------------|----------------------|
|                                       | Total model                      |                        |                         | 0.2668                 | 0.0287                              | 0.2489               |
| <b>HFSW intake (kcal)</b>             | Overweight & low stress n=16     | 0.314                  | 1.9347                  | 0.8714                 |                                     |                      |
|                                       | Normal weight & high stress n=45 | 1.5229                 | 0.8766                  | 0.0853                 |                                     |                      |
|                                       | Overweight & high stress n=23    | 0.3971                 | 1.2613                  | 0.7535                 |                                     |                      |
|                                       | Total model                      |                        |                         | 0.3147                 | 0.0261                              | 0.2375               |
| <b>LFSW intake (kcal)</b>             | Overweight & low stress n=16     | 2.317                  | 1.1258                  | <b>0.0421</b>          |                                     |                      |
|                                       | Normal weight & high stress n=45 | 1.1888                 | 0.5101                  | <b>0.0217</b>          |                                     |                      |
|                                       | Overweight & high stress n=23    | 1.5503                 | 0.734                   | <b>0.0370</b>          |                                     |                      |
|                                       | Total model                      |                        |                         | <b>0.0463</b>          | 0.0654                              | 0.1683               |
| <b>HFSA intake (kcal)</b>             | Overweight & low stress n=16     | 2.1115                 | 2.2834                  | 0.3574                 |                                     |                      |
|                                       | Normal weight & high stress n=45 | 0.713                  | 0.9915                  | 0.4737                 |                                     |                      |
|                                       | Overweight & high stress n=23    | 0.7253                 | 1.4194                  | 0.6105                 |                                     |                      |
|                                       | Total model                      |                        |                         | 0.7847                 | 0.0095                              | 0.1116               |
| <b>LFSA intake (kcal)</b>             | Overweight & low stress n=16     | 0.7076                 | 0.5507                  | 0.2018                 |                                     |                      |
|                                       | Normal weight & high stress n=45 | 0.678                  | 0.2571                  | <b>0.0098</b>          |                                     |                      |
|                                       | Overweight & high stress n=23    | 0.8185                 | 0.3488                  | <b>0.0210</b>          |                                     |                      |
|                                       | Total model                      |                        |                         | <b>0.0431</b>          | 0.0755                              | 0.133                |
|                                       |                                  | <b>AUCi RMSSD</b>      |                         |                        |                                     |                      |
| <b>Food lab responses</b>             |                                  | <b>b<sub>int</sub></b> | <b>SE<sub>int</sub></b> | <b>p<sub>int</sub></b> | <b>ΔR<sup>2</sup><sub>int</sub></b> | <b>R<sup>2</sup></b> |
| <b>Food intake (kcal)</b>             | Overweight & low stress n=16     | 0.4604                 | 0.4513                  | 0.3100                 |                                     |                      |
|                                       | Normal weight & high stress n=45 | -0.0566                | 0.2034                  | 0.7814                 |                                     |                      |
|                                       | Overweight & high stress n=23    | -0.1694                | 0.2859                  | 0.5548                 |                                     |                      |
|                                       | Total model                      |                        |                         | 0.6062                 | 0.0149                              | 0.1557               |
| <b>Energy density intake (kcal/g)</b> | Overweight & low stress n=16     | 0.0007                 | 0.0011                  | 0.5428                 |                                     |                      |
|                                       | Normal weight & high stress n=45 | -0.0001                | 0.0005                  | 0.9085                 |                                     |                      |
|                                       | Overweight & high stress n=23    | -0.0001                | 0.0007                  | 0.9295                 |                                     |                      |
|                                       | Total model                      |                        |                         | 0.9213                 | 0.0036                              | 0.2222               |
| <b>HFSW intake (kcal)</b>             | Overweight & low stress n=16     | 0.0414                 | 0.2076                  | 0.8423                 |                                     |                      |
|                                       | Normal weight & high stress n=45 | -0.0441                | 0.0936                  | 0.6386                 |                                     |                      |
|                                       | Overweight & high stress n=23    | -0.1994                | 0.1315                  | 0.1327                 |                                     |                      |
|                                       | Total model                      |                        |                         | 0.4270                 | 0.022                               | 0.1745               |
| <b>LFSW intake (kcal)</b>             | Overweight & low stress n=16     | 0.0577                 | 0.1200                  | 0.6314                 |                                     |                      |

|                           |                                  |         |        |        |        |        |
|---------------------------|----------------------------------|---------|--------|--------|--------|--------|
|                           | Normal weight & high stress n=45 | 0.0132  | 0.0541 | 0.8075 |        |        |
|                           | Overweight & high stress n=23    | 0.0737  | 0.0760 | 0.3345 |        |        |
|                           | Total model                      |         |        | 0.7510 | 0.0102 | 0.1113 |
| <b>HFSA intake (kcal)</b> | Overweight & low stress n=16     | 0.4552  | 0.2313 | 0.0518 |        |        |
|                           | Normal weight & high stress n=45 | -0.0843 | 0.0991 | 0.3972 |        |        |
|                           | Overweight & high stress n=23    | -0.0839 | 0.139  | 0.5476 |        |        |
|                           | Total model                      |         |        | 0.1027 | 0.0538 | 0.1526 |
| <b>LFSA intake (kcal)</b> | Overweight & low stress n=16     | 0.0252  | 0.0593 | 0.6724 |        |        |
|                           | Normal weight & high stress n=45 | 0.058   | 0.0255 | 0.0251 |        |        |
|                           | Overweight & high stress n=23    | 0.0473  | 0.0357 | 0.1882 |        |        |
|                           | Total model                      |         |        | 0.1614 | 0.0495 | 0.0862 |

Values given are in comparison to the control group: Low Stress Normal Weight (n=52). Significance is visualized by bolded for  $p \leq 0.05$ . Linear regression estimated marginal means and standard errors (mean $\pm$ SE) adjusted for age, sex and parental education, hunger at study start and liking of presented food. AUCi: area under the curve with respect to increase; RMSSD: Root Mean Square of the Successive Difference; HF: high fat; LF: low fat; SW: sweet; SA: savoury
